# Supplementary material
Source: PubMed Central journal article supplement (PMC2783383)
Supplement: NIHMS150603-supplement-01.pdf [file NIHMS150603-supplement-01.pdf]

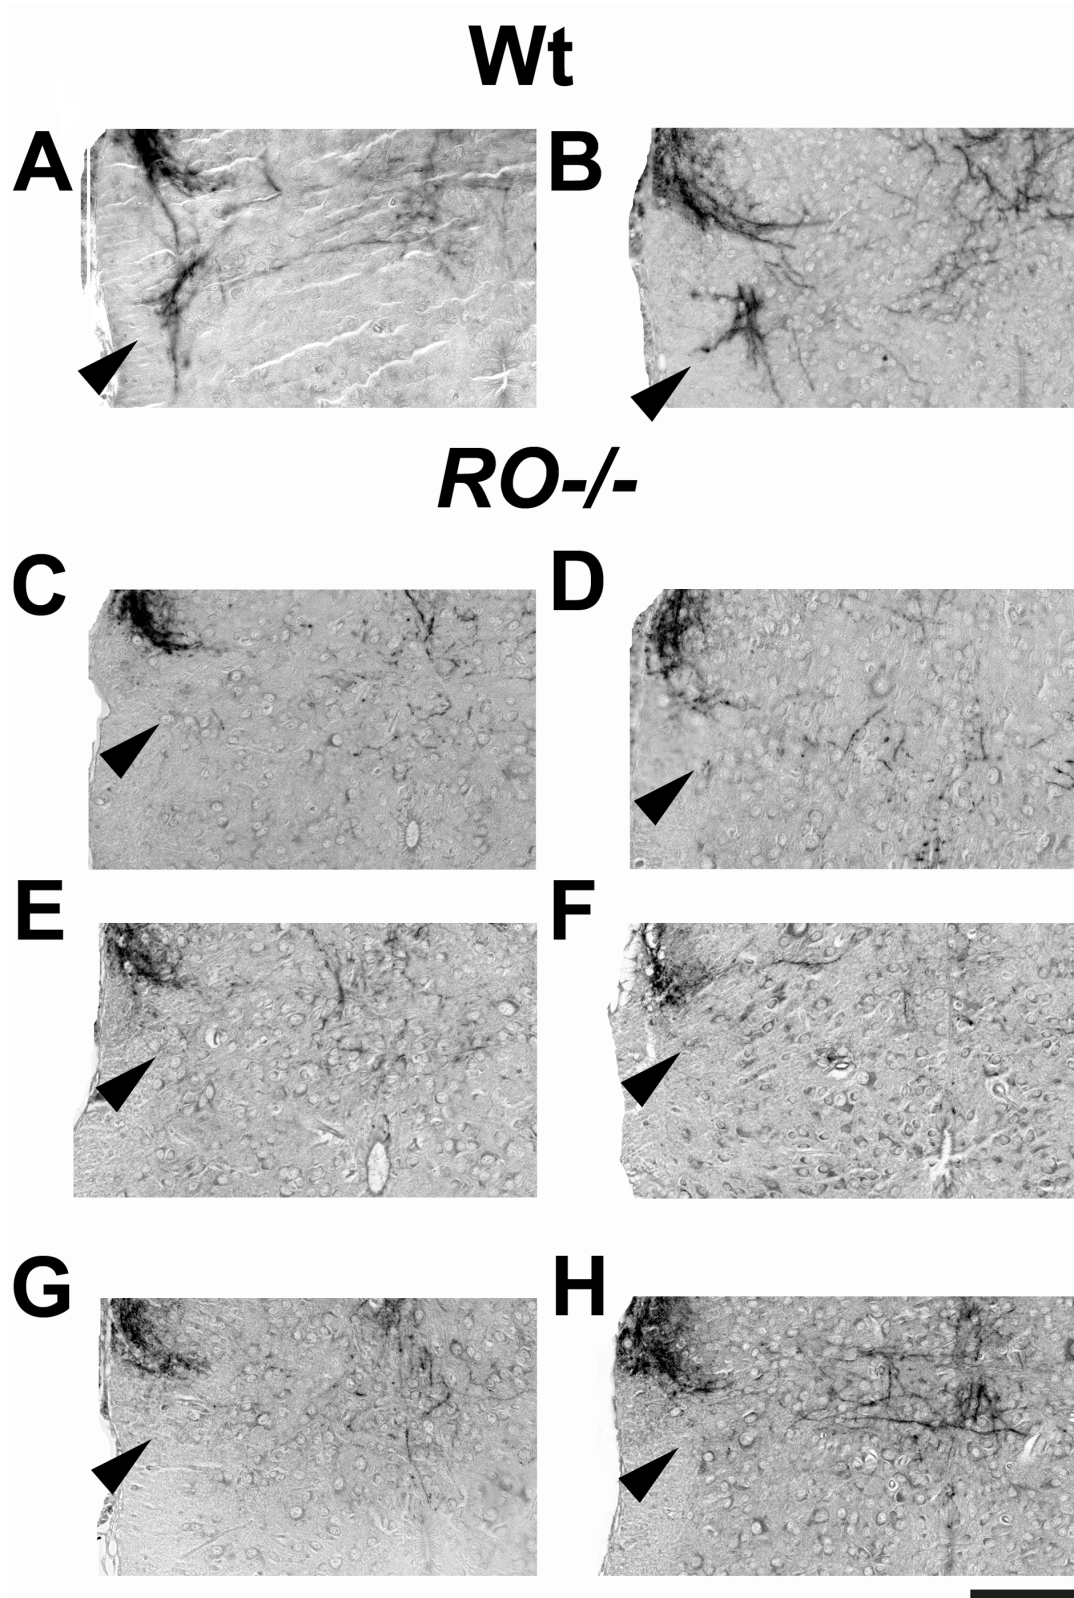

**Supplemental figure 1.** Transverse sections of lumbar spinal cord stained with CGRP antibody to label nociceptive afferents (**A-B**, wt; **C-H**, PTPRO<sup>-/-</sup>). Arrowheads point to location of projections in the ventral-medial region representing innervation from the hindlimb/paw. These projections are missing in the PTPRO<sup>-/-</sup> animals (**C-H**). Scale bar, 100  $\mu$ m.

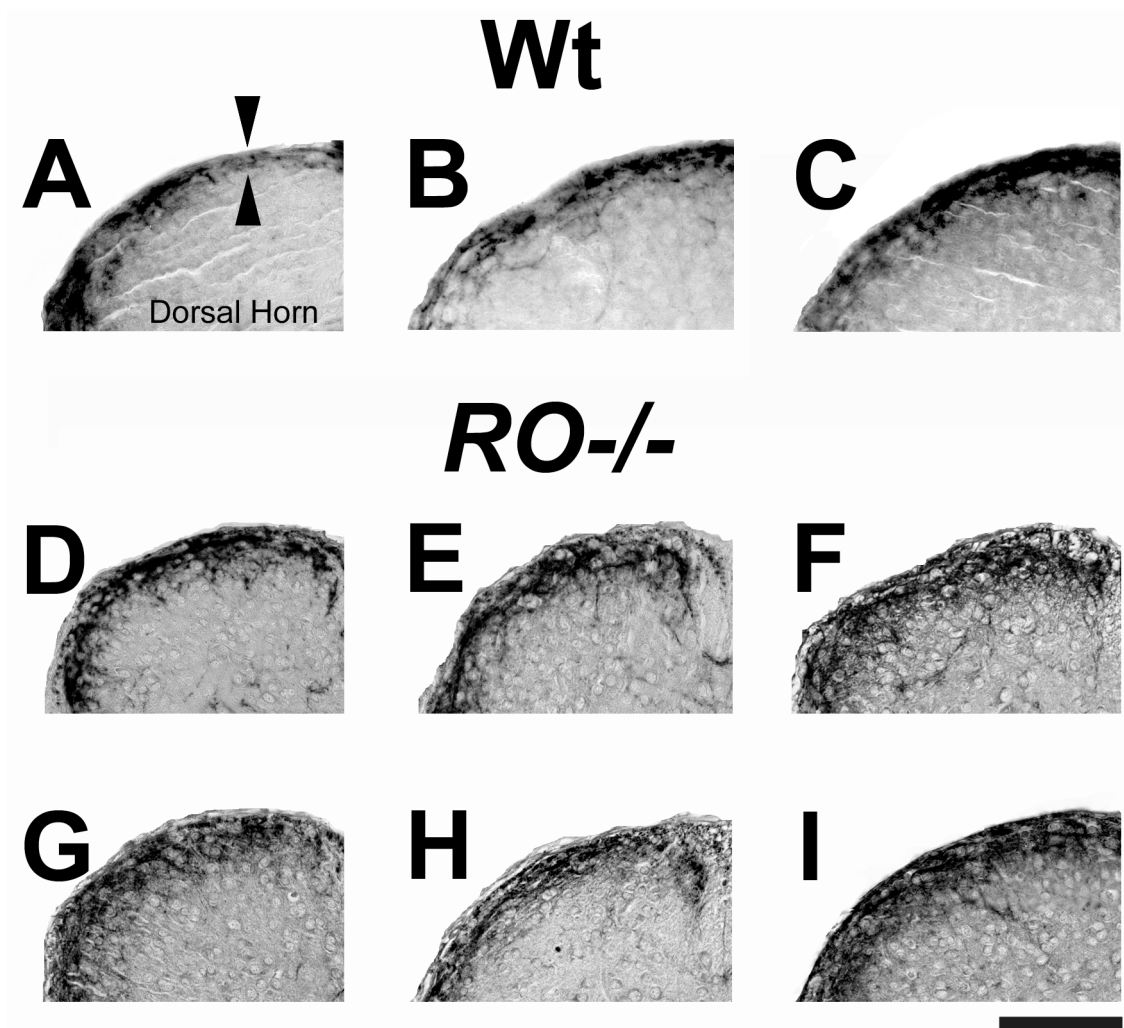

**Supplemental figure 2.** Transverse sections of lumbar spinal cord stained with CGRP antibody to label nociceptive afferents. (A-C, wt; D-I, PTPRO<sup>-/-</sup>). (A) Large arrowheads pointing to the outer borders of laminae I (top) and the outer portion of laminae II (bottom). Although there is some variability, axons appear less organized and project strongly beyond the border of lamina IIo in the PTPRO<sup>-/-</sup> animals (D-I). Scale bar, 100 $\mu$ m.

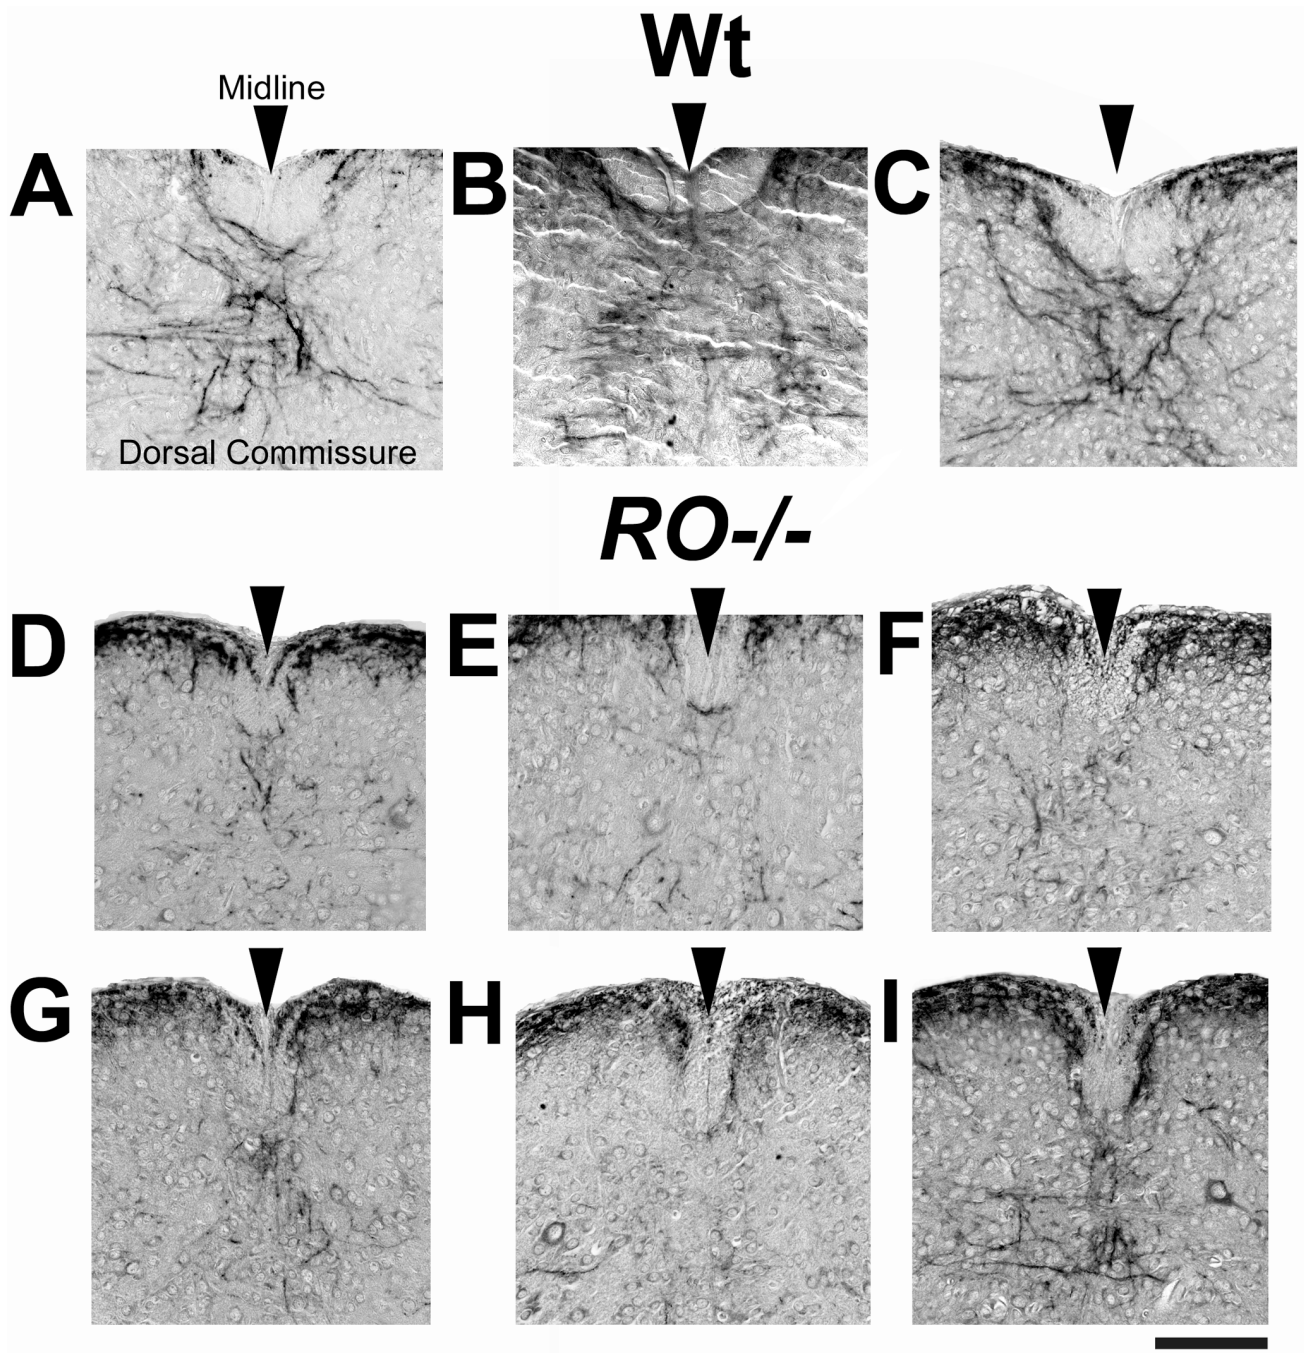

**Supplemental figure 3.** Transverse sections of lumbar spinal cord stained with CGRP antibody to label nociceptive afferents. (A-C, wt; D-I, PTPRO<sup>-/-</sup>). (A-I) Magnified view at the dorsal commissure area showing nociceptive axons crossing the midline (large arrowheads). Fewer axons cross the midline in the PTPRO<sup>-/-</sup> mice (D-I). Scale bar, 100  $\mu$ m.

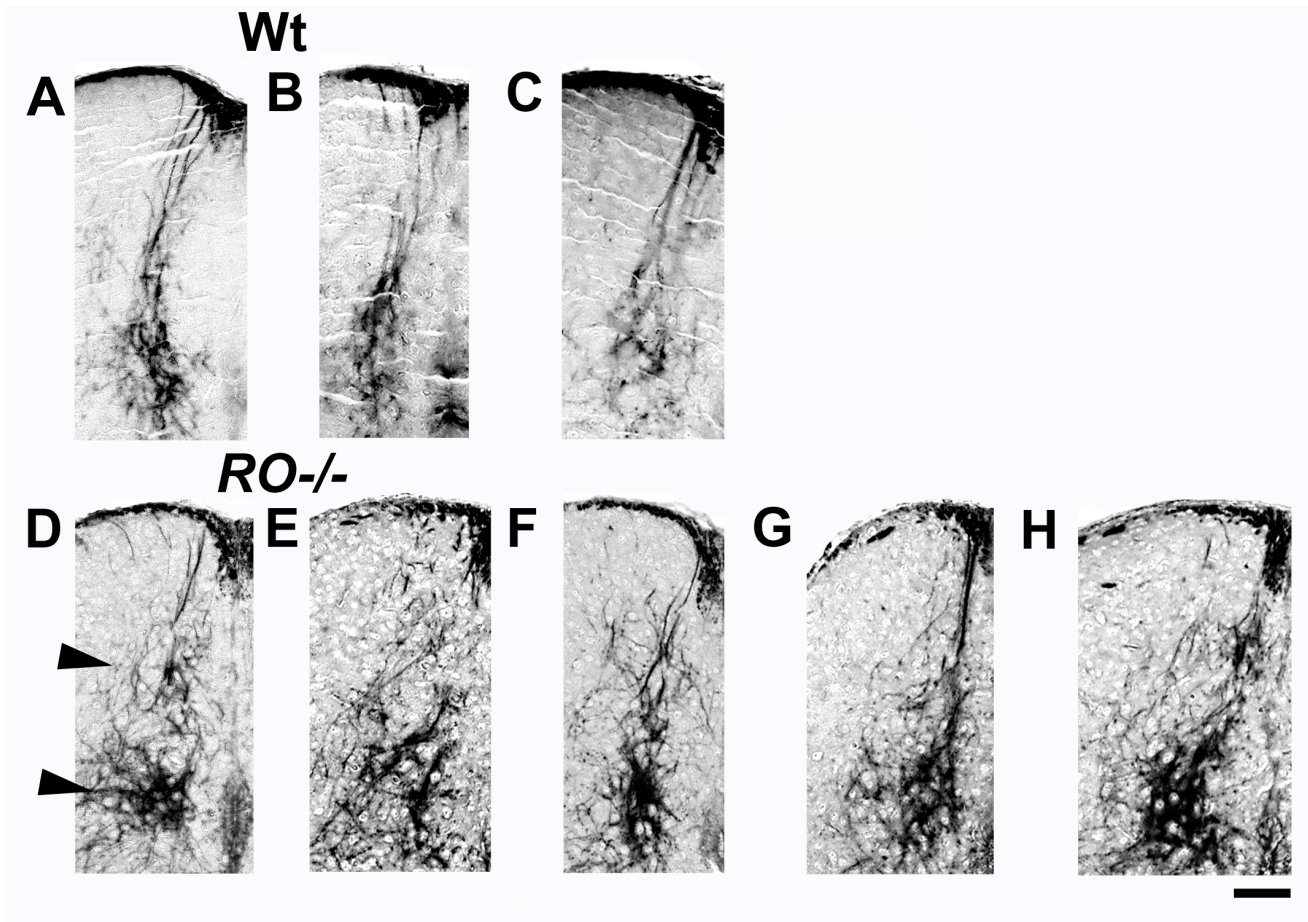

**Supplemental figure 4.** (A-D) P0 spinal cord sections stained with parvalbumin antibody to label proprioceptive projections in (A-C, wt; D-H, PTPRO<sup>-/-</sup>). (D) Top arrowhead points to the area of disorganized and defasciculated axonal projections in PTPRO<sup>-/-</sup> mice. Bottom arrowhead points to the area of increased parvalbumin immunoreactivity at the intermediate zone in the PTPRO<sup>-/-</sup> mice.
